# Supplementary material for: Exploring Two Pandemics in Academic Arena: Physical Activity and Sedentary Behaviors Profile of University Students in Bangladesh
Source: Eur J Investig Health Psychol Educ. 2021 Apr 16;11(2):358–71. doi: 10.3390/ejihpe11020027 (PMC8314348; doi:10.3390/ejihpe11020027)
Supplement: Supplementary file 1 [file ejihpe-11-00027-s001.zip › ejihpe-1140441-supplementary.pdf]

**Table S1:** Frequency Distributions by Categorical Characteristics

| <b>Characteristics</b>              | <b>Frequency</b> | <b>Percent</b> |
|-------------------------------------|------------------|----------------|
| <b>Semester</b>                     |                  |                |
| First Year First Semester           | 30               | 17.1           |
| Second Year First Semester          | 28               | 16.0           |
| Third Year First Semester           | 29               | 16.6           |
| Fourth Year First Semester          | 34               | 19.4           |
| Masters First Semester              | 27               | 15.4           |
| Masters Second Semester             | 27               | 15.4           |
| <b>Gender</b>                       |                  |                |
| Male                                | 120              | 68.6           |
| Female                              | 55               | 31.4           |
| <b>Father's Education</b>           |                  |                |
| Below Secondary                     | 21               | 12.0           |
| Secondary or Above                  | 154              | 88.0           |
| <b>Mother's Education</b>           |                  |                |
| Below Secondary                     | 24               | 13.7           |
| Secondary or Above                  | 151              | 86.3           |
| <b>Father's Occupation</b>          |                  |                |
| Agri Worker                         | 10               | 5.7            |
| Job/Service                         | 81               | 46.3           |
| Non-Agriculture Worker              | 18               | 10.3           |
| Others                              | 66               | 37.7           |
| <b>Mother's Occupation</b>          |                  |                |
| Housewife                           | 159              | 90.9           |
| Job/Service                         | 16               | 9.1            |
| <b>Type of Family</b>               |                  |                |
| Joint                               | 28               | 13.7           |
| Nuclear                             | 151              | 86.3           |
| <b>Place of Residence in Sylhet</b> |                  |                |
| Hall                                | 40               | 22.9           |
| Own Residence                       | 30               | 17.1           |
| Student Mess                        | 105              | 60.0           |
| <b>Area of Residence</b>            |                  |                |
| Rural                               | 58               | 33.1           |
| Urban                               | 117              | 66.9           |
| <b>Chronic Complications</b>        |                  |                |
| No                                  | 155              | 88.6           |
| Yes                                 | 20               | 11.4           |
| <b>Symptoms of COVID-19</b>         |                  |                |
| No                                  | 164              | 93.7           |
| Yes                                 | 11               | 6.3            |

**Table S2:** Descriptive Statistics of Non-Categorical Characteristics

| Characteristics          | Mean (SD)     |
|--------------------------|---------------|
| Age (in Years)           | 21.92 (1.75)  |
| Height (in Meters)       | 1.67 (0.10)   |
| Weight (in Kilograms)    | 63.38 (12.51) |
| BMI (kg/m <sup>2</sup> ) | 22.26 (3.36)  |
| RAI                      | 6.19(4.10)    |

SD = Standard Deviation.

**Table S3:** Family Income (in Taka) of Students in Two Situations

| Situation | Mean     | SD       | Range  |      | Difference |          | Correlation | p-value |
|-----------|----------|----------|--------|------|------------|----------|-------------|---------|
|           |          |          | High   | Low  | Mean       | SD       |             |         |
| B         | 47574.71 | 51897.66 | 600000 | 3000 | 13387.93   | 22215.19 | 0.91        | <.001   |
| D         | 34186.78 | 3358.82  | 500000 | 0.00 |            |          |             |         |

SD = Standard Deviation, B = Before COVID-19, D = During COVID-19.
